# Supplementary material for: Cyclodextrin-containing hydrogels as an intraocular lens for sustained drug release
Source: PubMed Central journal article supplement (PMC5731761; doi:10.1371/journal.pone.0189778), 2017-12-15
Supplement: pone.0189778.s001.pdf [file pone.0189778.s001.pdf]

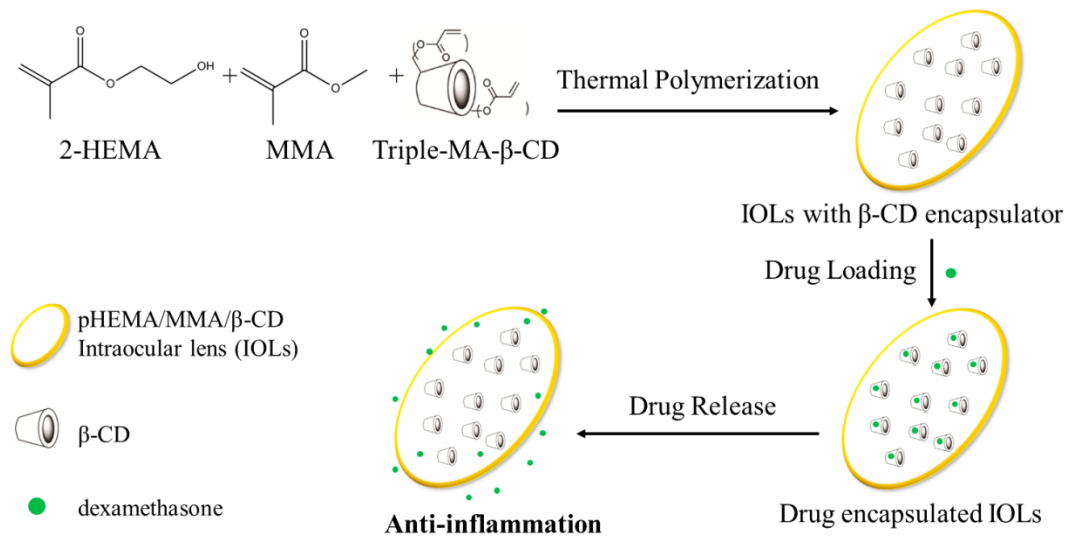

**S1 Fig. Illustration of pHEMA/MMA/β-CD IOLs with the Capability of Maintaining the Sustained Release of Anti-Inflammatory Drugs.**
