# Supplementary material for: Cyclodextrin-containing hydrogels as an intraocular lens for sustained drug release
Source: PubMed Central journal article supplement (PMC5731761; doi:10.1371/journal.pone.0189778), 2017-12-15
Supplement: pone.0189778.s003.pdf [file pone.0189778.s003.pdf]

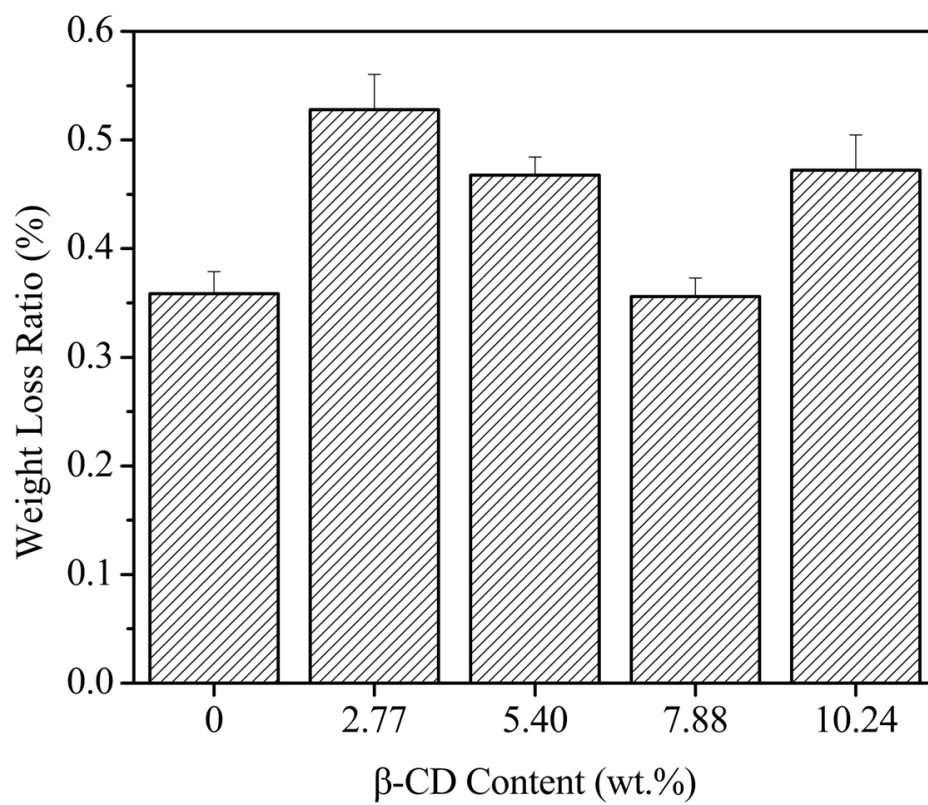

S3 Fig. Weight loss ratio of the pHEMA/MMA/ $\beta$ -CD hydrogels as a consequence of  $\beta$ -CD content
