# Supplementary material for: Cyclodextrin-containing hydrogels as an intraocular lens for sustained drug release
Source: PubMed Central journal article supplement (PMC5731761; doi:10.1371/journal.pone.0189778), 2017-12-15
Supplement: pone.0189778.s004.pdf [file pone.0189778.s004.pdf]

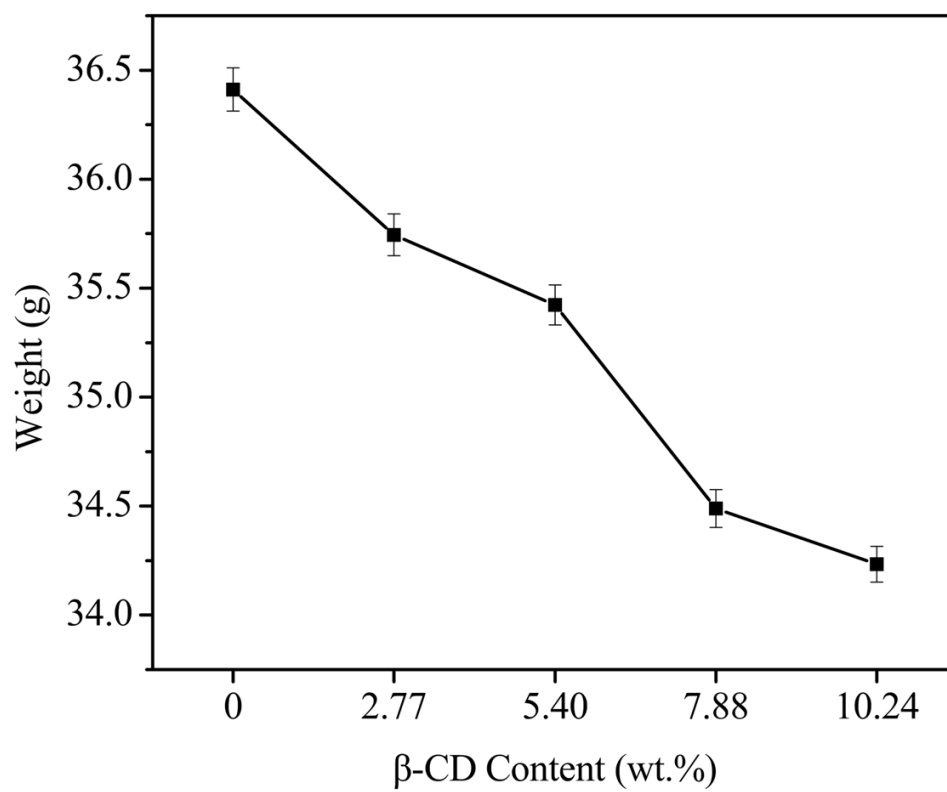

S4 Fig. Weight of the pHEMA/MMA/β-CD disks as a consequence of β-CD content
